# Supplementary material for: Chemosensory Characteristics of Brandies from Chinese Core Production Area and First Insights into Their Differences from Cognac
Source: MDPI journal article supplement (doi:10.3390/foods13010027), 2023-12-20
Supplement: s1 [file s1]

**Supplementary Table 1 Information for the Calibration Curve of Each Compound**

| No. | Compounds                          | CAS.       | Quantitative ion (m/z) | calibration curve    | R <sup>2</sup> | Concentration range (µg/L) |
|-----|------------------------------------|------------|------------------------|----------------------|----------------|----------------------------|
| 1   | ethyl acetate                      | 141-78-6   | -                      | y = 2.637x - 0.1479  | 0.9949         | 101750~13024000            |
| 2   | 2,3-butanedione                    | 431-03-8   | 279                    | y=11.822x+0.0335     | 0.9971         | 7.8~16000                  |
| 3   | 2-methyl-1-propanol                | 78-83-1    | -                      | y = 0.6673x - 0.0797 | 0.9941         | 30454~7796160              |
| 4   | 2-methyl-1-butanol                 | 137-32-6   | 57                     | y = 10.774x + 2.3865 | 0.9995         | 500~64000                  |
| 5   | 3-methyl-1-butanol                 | 123-51-3   | -                      | y = 0.8299x - 0.1482 | 0.9975         | 13446~27536640             |
| 6   | 1-pentanol                         | 71-41-0    | 42                     | y = 7.9791x + 1.638  | 0.9981         | 125~32000                  |
| 7   | 3-methyl-3-buten-1-ol              | 763-32-6   | 41                     | y = 2.4801x + 2.2077 | 0.9937         | 125~32000                  |
| 8   | 3-methyl-1-pentanol                | 589-35-5   | 56                     | y = 2.4374x - 0.9088 | 0.9936         | 125~32000                  |
| 9   | 1-hexanol                          | 111-27-3   | 56                     | y = 1.6767x + 0.2451 | 0.9994         | 1250~160000                |
| 10  | ethyl lactate                      | 97-64-3    | -                      | y = 0.3058x + 0.066  | 0.9911         | 3000~1690240               |
| 11  | (Z)-3-hexen-1-ol                   | 928-96-1   | 41                     | y = 1.9401x + 0.6607 | 0.9946         | 750~96000                  |
| 12  | ethyl octanoate                    | 106-32-1   | 88                     | y = 0.0971x - 0.0283 | 0.9964         | 9.4~9600                   |
| 13  | acetic acid                        | 64-19-7    | 43                     | y = 22.497x - 0.7797 | 0.9946         | 10000~160000               |
| 14  | furfural                           | 98-01-1    | 96                     | y = 1.4725x + 0.153  | 0.9933         | 62.5~160000                |
| 15  | 2-acetylfuran                      | 1192-62-7  | 95                     | y = 1.0209x - 0.1065 | 0.9988         | 125~32000                  |
| 16  | benzaldehyde                       | 100-52-7   | 106                    | y = 1.0562x + 0.2654 | 0.9960         | 250~32000                  |
| 17  | ethyl 2-hydroxy-4-methylpentanoate | 10348-47-7 | 69                     | y = 1.2114x + 0.6428 | 0.9962         | 125~32000                  |
| 18  | propanoic acid                     | 79-09-4    | 74                     | y = 24.033x - 0.5419 | 0.9956         | 1000~64000                 |
| 19  | 2-methyl-propanoic acid            | 79-31-2    | 43                     | y = 2.1217x + 0.1182 | 0.9998         | 1000~64000                 |
| 20  | 5-methylfurfural                   | 620-02-0   | 110                    | y = 4.377x - 3.3585  | 0.9954         | 250~32000                  |
| 21  | ethyl levulate                     | 539-88-8   | 43                     | y = 0.4653x - 0.0524 | 0.9998         | 100~12800                  |
| 22  | ethyl decanoate                    | 110-38-3   | 88                     | y = 0.576x + 0.091   | 0.9992         | 125~64000                  |
| 23  | ethyl 2-furoate                    | 614-99-3   | 95                     | y = 0.2813x + 0.4111 | 0.9938         | 15.6~32000                 |
| 24  | 3-methylbutanoic acid              | 503-74-2   | 60                     | y = 5.331x - 0.6668  | 0.9977         | 500~16000                  |
| 25  | diethyl succinate                  | 123-25-1   | 101                    | y = 0.8181x - 0.0072 | 0.9929         | 250~32000                  |
| 26  | β-damascenone                      | 23726-93-4 | 69                     | y = 13.032x - 7.2015 | 0.9953         | 125~32000                  |
| 27  | ethyl dodecanoate                  | 106-33-2   | 88                     | y = 0.4453x + 0.1651 | 0.9917         | 125~32000                  |

| No. | Compounds               | CAS.       | Quantitative ion (m/z) | calibration curve    | R <sup>2</sup> | Concentration range (µg/L) |
|-----|-------------------------|------------|------------------------|----------------------|----------------|----------------------------|
| 28  | hexanoic acid           | 142-62-1   | 60                     | y = 14.33x - 25.213  | 0.9915         | 75~9600                    |
| 29  | guaiaicol               | 90-05-1    | 109                    | y = 1.807x + 0.3688  | 0.9990         | 62.5~32000                 |
| 30  | (E)-whiskeylactone      | 39638-67-0 | 99                     | y = 0.0045x - 0.0097 | 0.9969         | 2.79~1427.5                |
| 31  | 2-phenylethanol         | 60-12-8    | 91                     | y = 0.3866x + 0.0941 | 0.9982         | 750~96000                  |
| 32  | (Z)-whiskeylactone      | 55013-32-6 | 99                     | y = 0.0048x - 0.0099 | 0.9955         | 2.09~1072.5                |
| 33  | phenol                  | 108-95-2   | 94                     | y = 0.7211x - 0.0792 | 0.9992         | 15.6~32000                 |
| 34  | ethyl tetradecanoate    | 124-06-1   | 88                     | y = 0.4328x + 0.2815 | 0.9967         | 62.5~32000                 |
| 35  | octanoic acid           | 124-07-2   | 60                     | y = 4.159x - 0.049   | 0.9942         | 750~96000                  |
| 36  | γ-nonalactone           | 104-61-0   | 85                     | y = 0.0092x - 0.0333 | 0.9941         | 2.2~1107.6                 |
| 37  | 2-methoxy-4-vinylphenol | 7786-61-0  | 135                    | y = 1.305x - 1.1454  | 0.9943         | 37.5~9600                  |
| 38  | ethyl hexadecanoate     | 628-97-7   | 88                     | y = 0.3972x + 0.3586 | 0.9935         | 31.3~32000                 |
| 39  | syringol                | 91-10-1    | 154                    | y = 0.6866x + 0.1593 | 0.9963         | 15.6~32000                 |
| 40  | γ-dodecalactone         | 2305-05-7  | 85                     | y = 0.0025x + 0.0001 | 0.9960         | 0.86~442.5                 |
| 41  | 5-hydroxymethylfurfural | 67-47-0    | 97                     | y = 4.0789x + 0.1024 | 0.9943         | 20000~640000               |
| 42  | vanillin                | 121-33-5   | 151                    | y = 1.2165x + 0.0535 | 0.9915         | 250~32000                  |
| 43  | ethyl vanillate         | 617-05-0   | 151                    | y = 0.3598x + 0.2478 | 0.9971         | 62.5~32000                 |

**Supplementary Table 2 Reference for Aroma Descriptors in Sensory Evaluation**

| No. | Aroma descriptor | Reference                                   |
|-----|------------------|---------------------------------------------|
| 1   | alcohol          | EtOH/H <sub>2</sub> O (40:60; v/v) solution |
| 2   | dried fruit      | Le Nez du Vin-almond                        |
| 3   | mushroom         | Le Nez du Vin-mushroom                      |
| 4   | floral           | Le Nez du Vin-rose                          |
| 5   | fruity           | Le Nez du Vin-blackcurrant                  |
| 6   | caramel          | Le Nez du Vin-caramel                       |
| 7   | spicy            | Le Nez du Vin-cinnamon、 clove               |
| 8   | toasted          | Le Nez du Vin-toast、 smoky                  |

**Supplementary Table 3** Identification of Odor-active Compounds Detected by GC-O and GC–MS in Brandies

| No. | Compounds                                 | RI   | RIL  | CAS.       | Aroma<br>descriptor         | Odor intensity |      |      |     |     |     |     |     |     |
|-----|-------------------------------------------|------|------|------------|-----------------------------|----------------|------|------|-----|-----|-----|-----|-----|-----|
|     |                                           |      |      |            |                             | CVS            | CX10 | CX15 | HVS | HXO | MVS | MXO | RVS | RXO |
| 1   | ethyl acetate                             | 863  | 887  | 141-78-6   | sour fruit                  | 2.0            | 2.1  | 2.1  | 1.1 | 1.5 | 1.7 | 1.6 | 1.6 | 1.6 |
| 2   | 2,3-butanedione                           | 956  | 977  | 431-03-8   | milky                       | 1.5            | 2.8  | 3.0  | 1.5 | 2.5 | 1.5 | 2.1 | 3.0 | 3.3 |
| 3   | 2-methyl-1-propanol                       | 1109 | 1098 | 78-83-1    | green                       | 1.7            | 1.4  | 1.8  | 1.8 | 1.8 | 1.9 | 1.9 | 2.0 | 2.1 |
| 4   | 2-methyl-1-butanol                        | 1200 | 1207 | 137-32-6   | solvent                     | 3.2            | 2.8  | 3.1  | 2.8 | 2.6 | 2.4 | 2.2 | 2.0 | 2.1 |
| 5   | 3-methyl-1-butanol                        | 1222 | 1211 | 123-51-3   | bitter, roasted<br>hazelnut | 4.0            | 3.9  | 4.2  | 4.2 | 3.9 | 3.7 | 3.7 | 3.9 | 3.7 |
| 6   | 1-pentanol                                | 1263 | 1255 | 71-41-0    | sweet fruit                 | 1.0            | 1.6  | -    | -   | -   | 1.9 | 2.0 | 2.1 | -   |
| 7   | 3-methyl-3-buten-1-ol                     | 1270 | 1247 | 763-32-6   | sweet, caramel              | 1.9            | 2.1  | -    | 2.0 | 1.9 | 2.0 | 2.1 | -   | -   |
| 8   | 3-methyl-1-pentanol                       | 1324 | 1331 | 589-35-5   | creamy, fruity              | 2.1            | 2.2  | -    | 2.4 | 2.7 | 2.6 | 2.7 | 2.7 | 2.6 |
| 9   | 1-hexanol                                 | 1347 | 1357 | 111-27-3   | gasoline, gas               | 2.9            | 2.9  | 3.3  | 3.4 | 3.2 | 3.0 | 3.3 | 3.2 | 3.2 |
| 10  | ethyl lactate                             | 1361 | 1345 | 97-64-3    | sweet fruit                 | 1.9            | 2.1  | 2.1  | 2.2 | 2.0 | 1.9 | 2.3 | 3.4 | 2.2 |
| 11  | (Z)-3-hexen-1-ol                          | 1381 | 1389 | 928-96-1   | green apple                 | 3.0            | 3.1  | 3.3  | 3.5 | 3.3 | 3.3 | 3.2 | 3.3 | 3.3 |
| 12  | ethyl octanoate                           | 1383 | 1440 | 106-32-1   | sweet fruit                 | 1.9            | 2.2  | 2.3  | 2.4 | 2.4 | 2.2 | 2.1 | 2.0 | 2.0 |
| 13  | acetic acid                               | 1455 | 1461 | 64-19-7    | acetic acid                 | 4.4            | 4.4  | 4.4  | 4.3 | 4.3 | 4.4 | 4.3 | 4.4 | 4.4 |
| 14  | furfural                                  | 1461 | 1457 | 98-01-1    | toasted                     | 2.4            | 2.5  | 2.7  | 2.6 | 2.5 | -   | 2.9 | -   | -   |
| 15  | 2-acetylfuran                             | 1505 | 1498 | 1192-62-7  | salty                       | 1.1            | 1.5  | 1.5  | 1.4 | 1.7 | 1.5 | 1.5 | 1.7 | 1.6 |
| 16  | benzaldehyde                              | 1519 | 1528 | 100-52-7   | fresh green                 | -              | -    | -    | -   | -   | 2.2 | 2.2 | -   | -   |
| 17  | ethyl<br>2-hydroxy-4-methylpenta<br>noate | 1526 | 1545 | 10348-47-7 | lilac buds                  | 2.2            | 2.4  | 2.8  | 2.6 | 2.9 | 2.7 | 2.7 | 2.7 | 2.8 |
| 18  | propanoic acid                            | 1538 | 1535 | 79-09-4    | sour, cheese                | -              | -    | -    | 2.4 | -   | 2.2 | 2.3 | 2.1 | 2.0 |

| No. | Compounds               | RI   | RIL  | CAS.       | Aroma<br>descriptor | Odor intensity |      |      |     |     |     |     |     |     |
|-----|-------------------------|------|------|------------|---------------------|----------------|------|------|-----|-----|-----|-----|-----|-----|
|     |                         |      |      |            |                     | CVS            | CX10 | CX15 | HVS | HXO | MVS | MXO | RVS | RXO |
| 19  | 2-methyl-propanoic acid | 1554 | 1564 | 79-31-2    | sour                | 2.4            | 2.5  | 2.7  | 2.9 | 2.7 | 2.9 | 2.9 | 2.6 | 2.8 |
| 20  | 5-methylfurfural        | 1573 | 1573 | 620-02-0   | milk, sweet         | 2.3            | 2.3  | 2.2  | 2.1 | 2.2 | 2.2 | 2.1 | 1.9 | 1.9 |
| 21  | ethyl levulate          | 1599 | 1614 | 539-88-8   | sweet fruit         | -              | -    | 0.5  | 1.5 | 1.7 | 1.7 | 1.7 | 1.7 | 1.5 |
| 22  | ethyl decanoate         | 1602 | 1633 | 110-38-3   | apple               | 1.8            | 2.0  | 1.6  | 1.6 | 1.7 | 1.7 | 1.7 | 1.9 | 1.9 |
| 23  | ethyl 2-furoate         | 1608 | 1611 | 614-99-3   | toasted             | 2.5            | 1.9  | 1.8  | 2.0 | 1.9 | 1.7 | 1.8 | 2.1 | 2.2 |
| 24  | 3-methylbutanoic acid   | 1655 | 1664 | 503-74-2   | sour                | 4.4            | 4.4  | 4.1  | 4.3 | 3.8 | 3.4 | 3.9 | 3.7 | 3.8 |
| 25  | diethyl succinate       | 1655 | 1687 | 123-25-1   | sweet fruit         | 2.2            | 2.1  | 2.4  | 2.7 | 2.7 | 2.7 | 2.7 | 2.7 | 2.8 |
| 26  | $\beta$ -damascenone    | 1821 | 1821 | 23726-93-4 | sweet fruit         | -              | -    | -    | -   | 3.1 | 3.2 | 3.1 | 3.1 | -   |
| 27  | ethyl dodecanoate       | 1834 | 1843 | 106-33-2   | black currant       | 3.7            | 3.7  | -    | 3.7 | 3.9 | 3.9 | 3.7 | 3.8 | 3.7 |
| 28  | hexanoic acid           | 1841 | 1850 | 142-62-1   | bitter, acid        | 3.0            | 3.1  | 3.0  | 3.2 | 3.1 | 3.1 | 3.0 | 3.1 | 3.0 |
| 29  | guaiacol                | 1861 | 1871 | 90-05-1    | smoky               | 3.8            | 3.6  | 3.5  | 3.7 | 3.4 | 3.5 | 3.4 | 3.5 | 3.7 |
| 30  | (E)-whiskeylactone      | 1900 | 1899 | 39638-67-0 | caramel             | 3.0            | 3.4  | 4.0  | 3.3 | 3.9 | 3.5 | 3.5 | 3.4 | 3.8 |
| 31  | 2-phenylethanol         | 1910 | 1901 | 60-12-8    | rose                | 4.4            | 4.2  | 4.3  | 4.3 | 4.2 | 4.4 | 4.2 | 4.4 | 4.5 |
| 32  | (Z)-whiskeylactone      | 1968 | 1976 | 55013-32-6 | toasted,<br>caramel | 3.2            | 3.2  | 4.2  | 3.6 | 4.0 | 3.1 | 3.8 | 2.9 | 4.1 |
| 33  | phenol                  | 1998 | 2004 | 108-95-2   | sour                | 2.4            | 2.3  | 2.5  | 2.3 | 2.6 | 2.7 | 2.5 | 2.5 | 2.6 |
| 34  | ethyl tetradecanoate    | 2037 | 2063 | 124-06-1   | sweet fruit         | -              | -    | -    | -   | -   | -   | -   | 2.9 | 2.7 |
| 35  | octanoic acid           | 2044 | 2044 | 124-07-2   | sour                | 2.9            | 2.8  | -    | 2.9 | 2.6 | 2.6 | 2.7 | 2.7 | 2.7 |
| 36  | $\gamma$ -nonalactone   | 2046 | 2012 | 104-61-0   | apricot, peach      | 1.8            | 2.0  | 2.0  | 3.0 | 3.5 | 3.8 | 3.0 | 2.6 | 4.0 |
| 37  | 2-methoxy-4-vinylphenol | 2207 | 2194 | 7786-61-0  | bitter, smoky       | -              | -    | -    | -   | 2.6 | -   | 2.6 | 2.6 | 2.8 |
| 38  | ethyl hexadecanoate     | 2229 | 2255 | 628-97-7   | toasted,<br>creamy  | 2.4            | 2.4  | 2.5  | 2.2 | 2.4 | 2.4 | 2.4 | 2.5 | 2.5 |

| No. | Compounds               | RI   | RIL  | CAS.      | Aroma<br>descriptor  | Odor intensity |      |      |     |     |     |     |     |     |
|-----|-------------------------|------|------|-----------|----------------------|----------------|------|------|-----|-----|-----|-----|-----|-----|
|     |                         |      |      |           |                      | CVS            | CX10 | CX15 | HVS | HXO | MVS | MXO | RVS | RXO |
| 39  | syringol                | 2278 | 2303 | 91-10-1   | spicy, salty         | 3.6            | 3.6  | 3.5  | 3.9 | 3.8 | 3.9 | 3.8 | 3.6 | 3.6 |
| 40  | $\gamma$ -dodecalactone | 2359 | 2376 | 2305-05-7 | creamy               | 3.5            | 1.8  | 2.1  | 2.7 | 2.3 | 2.5 | 2.9 | 2.3 | 2.9 |
| 41  | 5-hydroxymethylfurfural | 2519 | 2528 | 67-47-0   | milky, sweet         | 2.0            | 1.9  | 1.9  | 2.0 | 2.1 | 2.2 | 2.1 | 2.0 | 1.9 |
| 42  | vanillin                | 2595 | 2589 | 121-33-5  | bitter, toasted      | 2.0            | 1.9  | 1.9  | 1.9 | 1.9 | 2.0 | 2.0 | 2.1 | 2.4 |
| 43  | ethyl vanillate         | 2650 | 2668 | 617-05-0  | smoky, bitter        | 1.9            | 2.2  | 1.7  | 1.7 | 2.1 | 2.2 | 2.2 | 2.2 | 2.1 |
| 44  | methyl salicylate       | 1787 | 1778 | 119-36-8  | fried peanuts        | 2.1            | 1.9  | 1.7  | 2.7 | 1.7 | 2.0 |     |     |     |
| 45  | creosol                 | 1948 | 1959 | 93-51-6   | bitter,<br>medicinal | 3.1            | 3.6  | 3.2  | 2.9 | 2.4 | -   | 2.9 | 2.6 | 3.3 |
| 46  | ethyl cinnamate         | 2092 | 2104 | 103-36-6  | sweet                |                |      |      | 2.5 | 2.9 | 2.1 | 2.2 | 2.3 | 3.5 |
| 47  | unknown                 | 1099 |      |           | toasted              |                | 2.2  | 1.7  | 2.1 | 1.9 | 1.8 | 1.8 | 2.2 | 2.9 |
| 48  | unknown                 | 1103 |      |           | smoky                |                |      |      |     | -   | -   | 2.2 | 2.3 | 2.6 |
| 49  | unknown                 | 1186 |      |           | caramel              | 1.9            | 2.9  | 2.7  | 3.2 | 3.1 | 2.5 | 2.7 | 2.4 | 3.3 |
| 50  | unknown                 | 2154 |      |           | toasted              | 2.9            | 1.9  | 2.4  | 2.1 | 1.9 | 2.0 | 1.9 | 2.1 | 2.1 |
| 51  | unknown                 | 2319 |      |           | spicy                | 3.5            | 3.4  | 3.4  | 4.0 | 3.1 | 3.9 | 3.8 | 3.6 | 3.8 |

**Supplementary Table 4** Variable Importance in the Projection (VIP) of the First Two Explanatory Variable of PLS-R Model

| Variable                           | VIP   | Standard deviation | Lower bound(95%) | Upper bound(95%) | VIP   | Standard deviation | Lower bound(95%) | Upper bound(95%) |
|------------------------------------|-------|--------------------|------------------|------------------|-------|--------------------|------------------|------------------|
| 5-methylfurfural                   | 1.611 | 0.207              | 1.133            | 2.089            | 1.376 | 0.208              | 0.897            | 1.855            |
| $\gamma$ -nonalactone              | 1.593 | 0.239              | 1.043            | 2.144            | 1.378 | 0.193              | 0.932            | 1.825            |
| ethyl lactate                      | 1.526 | 0.438              | 0.516            | 2.535            | 1.327 | 0.374              | 0.463            | 2.190            |
| $\gamma$ -dodecalactone            | 1.503 | 0.618              | 0.077            | 2.929            | 1.348 | 0.512              | 0.167            | 2.529            |
| ethyl 2-hydroxy-4-methylpentanoate | 1.494 | 0.434              | 0.494            | 2.494            | 1.275 | 0.388              | 0.381            | 2.169            |
| furfural                           | 1.478 | 0.263              | 0.871            | 2.086            | 1.263 | 0.235              | 0.721            | 1.804            |
| diethyl succinate                  | 1.476 | 0.521              | 0.275            | 2.676            | 1.262 | 0.426              | 0.281            | 2.243            |
| 1-hexanol                          | 1.349 | 0.524              | 0.140            | 2.558            | 1.152 | 0.469              | 0.070            | 2.234            |
| octanoic acid                      | 1.330 | 0.346              | 0.531            | 2.129            | 1.139 | 0.242              | 0.580            | 1.698            |
| (Z)-whiskeylactone                 | 1.312 | 0.411              | 0.363            | 2.260            | 1.120 | 0.361              | 0.288            | 1.952            |
| ethyl hexadecanoate                | 1.276 | 0.639              | -0.198           | 2.751            | 1.123 | 0.557              | -0.162           | 2.409            |
| 3-methylbutanoic acid              | 1.276 | 0.349              | 0.471            | 2.080            | 1.107 | 0.307              | 0.399            | 1.816            |
| propanoic acid                     | 1.263 | 0.343              | 0.473            | 2.052            | 1.132 | 0.308              | 0.421            | 1.843            |
| ethyl acetate                      | 1.210 | 0.693              | -0.387           | 2.808            | 1.193 | 0.447              | 0.162            | 2.224            |
| ethyl levulate                     | 1.101 | 0.650              | -0.398           | 2.599            | 1.028 | 0.632              | -0.430           | 2.486            |
| ethyl vanillate                    | 1.031 | 0.717              | -0.621           | 2.684            | 1.161 | 0.381              | 0.283            | 2.039            |
| (E)-whiskeylactone                 | 1.019 | 0.502              | -0.139           | 2.176            | 0.873 | 0.459              | -0.186           | 1.932            |
| $\beta$ -damascenone               | 1.014 | 0.486              | -0.108           | 2.136            | 0.928 | 0.498              | -0.221           | 2.077            |
| 2-acetylfuran                      | 0.933 | 0.764              | -0.828           | 2.695            | 1.195 | 0.412              | 0.245            | 2.145            |
| 2-phenylethanol                    | 0.932 | 0.673              | -0.620           | 2.483            | 1.141 | 0.617              | -0.283           | 2.564            |
| vanillin                           | 0.919 | 0.696              | -0.687           | 2.524            | 1.147 | 0.337              | 0.370            | 1.924            |
| 2-methoxy-4-vinylphenol            | 0.727 | 0.707              | -0.904           | 2.357            | 1.076 | 0.466              | 0.001            | 2.152            |
| syringol                           | 0.353 | 0.715              | -1.295           | 2.000            | 1.080 | 0.535              | -0.154           | 2.315            |

| Variable | VIP   | Standard<br>deviation | Lower<br>bound(95%) | Upper<br>bound(95%) | VIP   | Standard<br>deviation | Lower<br>bound(95%) | Upper<br>bound(95%) |
|----------|-------|-----------------------|---------------------|---------------------|-------|-----------------------|---------------------|---------------------|
| guaiacol | 0.128 | 0.599                 | -1.253              | 1.509               | 1.051 | 0.519                 | -0.146              | 2.249               |

**Supplementary Table 5** Variable Identification (VID) Coefficients of Selected Aroma Compounds for Each Aroma Attribute

| Compounds               | Alcohol | Dried fruit | Floral | Fruity | Caramel | Toasted | Spicy  | Mushroom |
|-------------------------|---------|-------------|--------|--------|---------|---------|--------|----------|
| (Z)-whiskeylactone      |         | 0.876       |        |        |         |         |        |          |
| 1-hexanol               |         |             |        |        |         |         | 0.891  |          |
| 2-acetylfuran           | -0.847  |             |        |        |         | 0.892   |        |          |
| 2-methyl-1-propanol     | -0.857  |             |        |        |         |         |        |          |
| 5-methylfurfural        |         | 0.825       |        | -0.809 |         |         | 0.813  |          |
| benzaldehyde            |         |             |        |        |         |         |        | 0.907    |
| ethyl acetate           |         | 0.870       |        |        |         | 0.932   |        |          |
| ethyl lactate           |         | 0.909       | -0.837 | -0.803 |         |         | 0.841  |          |
| ethyl octanoate         |         |             |        |        |         |         |        |          |
| ethyl vanillate         |         |             |        |        |         | 0.890   |        |          |
| furfural                |         |             |        | -0.825 |         |         | 0.900  |          |
| octanoic acid           |         |             |        |        |         |         |        |          |
| vanillin                |         |             |        |        |         | 0.916   |        |          |
| $\beta$ -damascenone    |         |             |        |        |         |         |        | 0.843    |
| $\gamma$ -dodecalactone |         |             | 0.883  | 0.874  |         |         | -0.834 |          |
| $\gamma$ -nonalactone   |         |             | 0.906  | 0.864  |         |         | -0.832 |          |

|             | sample    | subject   | repeat  | sample:subject | sample:repeat | subject:repeat |
|-------------|-----------|-----------|---------|----------------|---------------|----------------|
| floral      | 1.215e-42 | 0.01534   | 0.04197 | 0.7736         | 0.181         | 0.7797         |
| toasted     | 2.722e-37 | 0.147     | 0.06966 | 0.5442         | 0.3035        | 0.5499         |
| dried.fruit | 3.632e-34 | 0.08164   | 0.7905  | 0.6002         | 0.1962        | 0.3673         |
| alcohol     | 8.189e-34 | 0.001845  | 0.9076  | 0.1356         | 0.2549        | 0.2483         |
| fruity      | 1.881e-33 | 0.1406    | 0.5417  | 0.9427         | 0.7451        | 0.4823         |
| spicy       | 4.681e-33 | 0.007568  | 0.3953  | 0.2599         | 0.1888        | 0.08484        |
| mushroom    | 1.786e-29 | 0.6353    | 0.2474  | 0.2515         | 0.9867        | 0.909          |
| caramel     | 6.591e-28 | 1.446e-05 | 0.7175  | 0.01743        | 0.9081        | 0.04556        |

**Supplementary Figure 1** Panel Performance in Evaluating Different Aroma Descriptor. The panel performance was assessed by ANOVA (*panelperf* function from the *SensoMineR* package (Husson & Le, 2008)), and statistically significant values ( $p < 0.05$ ) were marked in the gray table cell. The dependent variables were the eight attributes and the independent variables were the factors associated with the sample effect, the subject effect, the repeat effect, and all their first-order interactions. If there was a significant sample effect, the panel discriminated the samples with respect to the target sensory attribute (discrimination); if there was a significant sample  $\times$  subject interaction, subjects did not have the same perception of the samples with respect to the target sensory attribute (no agreement); if there was a significant sample  $\times$  repeat interaction, subjects were not consistent among replications.
